# Supplementary material for: Biogeography and genetic diversity of clinical isolates of Burkholderia pseudomallei in Sri Lanka
Source: PubMed Central journal article supplement (PMC8824316; doi:10.1371/journal.pntd.0009917), 2021-12-01
Supplement: pntd.0009917.s001.pdf [file pntd.0009917.s001.pdf]

**S1 Table.** Clinical presentations of melioidosis (n=310)

| <b>Clinical presentation</b>                                                   | <b>Number</b> | <b>Percentage (%)</b> |
|--------------------------------------------------------------------------------|---------------|-----------------------|
| Sepsis                                                                         | 198           | 63.8                  |
| Abscess                                                                        | 150           | 48.4                  |
| Pneumonia                                                                      | 89            | 28.7                  |
| Septic arthritis                                                               | 47            | 15.2                  |
| Neurological melioidosis                                                       | 11            | 3.5                   |
| Other (urinary, bone, cellulitis, endocarditis, prostatitis, sinusitis, etc.,) | 64            | 20.6                  |
