# Supplementary material for: Biogeography and genetic diversity of clinical isolates of Burkholderia pseudomallei in Sri Lanka
Source: PubMed Central journal article supplement (PMC8824316; doi:10.1371/journal.pntd.0009917), 2021-12-01
Supplement: pntd.0009917.s004.pdf [file pntd.0009917.s004.pdf]

S4 Table. Multilocus sequence typing of 84 Sri Lankan clinical isolates

| PubMLST strain id<br>( <a href="http://pubmlst.org/bpseudomallei.mlst.net/">http://pubmlst.org/bpseudomallei.mlst.net/</a> ) | Allelic profiles |             |             |             |             |             |            | Sequence type |
|------------------------------------------------------------------------------------------------------------------------------|------------------|-------------|-------------|-------------|-------------|-------------|------------|---------------|
|                                                                                                                              | <i>ace</i>       | <i>gltB</i> | <i>gmhD</i> | <i>lepA</i> | <i>lipA</i> | <i>narK</i> | <i>ndh</i> |               |
| 6414                                                                                                                         | 1                | 2           | 6           | 4           | 1           | 2           | 3          | 1884          |
| 6415                                                                                                                         | 1                | 4           | 3           | 2           | 1           | 61          | 1          | 1885          |
| 6417                                                                                                                         | 4                | 4           | 13          | 4           | 1           | 2           | 1          | 1887          |
| 6418                                                                                                                         | 4                | 4           | 10          | 2           | 1           | 42          | 1          | 1888          |
| 6419                                                                                                                         | 1                | 4           | 3           | 4           | 1           | 1           | 1          | 1889          |
| 6420                                                                                                                         | 4                | 12          | 6           | 19          | 1           | 2           | 1          | 1890          |
| 6421                                                                                                                         | 1                | 4           | 3           | 1           | 1           | 2           | 3          | 1891          |
| 6422                                                                                                                         | 4                | 6           | 6           | 2           | 1           | 1           | 3          | 1892          |
| 6423                                                                                                                         | 4                | 2           | 6           | 2           | 1           | 2           | 1          | 1893          |
| 6424                                                                                                                         | 1                | 4           | 3           | 4           | 1           | 1           | 1          | 1889          |
| 6425                                                                                                                         | 1                | 2           | 3           | 2           | 1           | 60          | 1          | 1883          |
| 6426                                                                                                                         | 1                | 12          | 6           | 2           | 5           | 8           | 3          | 1882          |
| 6427                                                                                                                         | 4                | 2           | 3           | 4           | 20          | 2           | 3          | 1895          |
| 6428                                                                                                                         | 1                | 1           | 10          | 3           | 1           | 1           | 3          | 1881          |
| 6429                                                                                                                         | 1                | 12          | 6           | 2           | 1           | 60          | 3          | 1880          |
| 6430                                                                                                                         | 1                | 2           | 6           | 2           | 20          | 8           | 3          | 1894          |
| 6431                                                                                                                         | 1                | 12          | 6           | 4           | 1           | 8           | 3          | 1898          |
| 6432                                                                                                                         | 4                | 2           | 13          | 2           | 1           | 2           | 1          | 1900          |
| 6433                                                                                                                         | 1                | 2           | 3           | 4           | 1           | 2           | 57         | 590           |
| 6434                                                                                                                         | 1                | 4           | 3           | 2           | 1           | 2           | 1          | 594           |
| 6435                                                                                                                         | 1                | 4           | 3           | 2           | 1           | 2           | 1          | 594           |
| 6436                                                                                                                         | 1                | 4           | 3           | 2           | 1           | 2           | 1          | 594           |
| 6437                                                                                                                         | 4                | 4           | 3           | 4           | 3           | 2           | 20         | 1928          |
| 6438                                                                                                                         | 1                | 2           | 6           | 46          | 1           | 2           | 57         | 1929          |
| 6439                                                                                                                         | 1                | 12          | 6           | 2           | 20          | 1           | 3          | 1146          |
| 6440                                                                                                                         | 1                | 12          | 14          | 4           | 1           | 1           | 3          | 1930          |
| 6441                                                                                                                         | 1                | 2           | 6           | 2           | 1           | 8           | 3          | 1137          |
| 6442                                                                                                                         | 4                | 2           | 6           | 2           | 1           | 1           | 3          | 1140          |
| 6443                                                                                                                         | 4                | 2           | 6           | 2           | 1           | 1           | 3          | 1140          |
| 6444                                                                                                                         | 4                | 12          | 3           | 4           | 25          | 2           | 3          | 421           |
| 6445                                                                                                                         | 1                | 2           | 6           | 4           | 1           | 2           | 57         | 1135          |
| 6446                                                                                                                         | 18               | 4           | 3           | 4           | 1           | 1           | 1          | 1439          |
| 6447                                                                                                                         | 1                | 2           | 6           | 2           | 1           | 8           | 3          | 1137          |
| 6448                                                                                                                         | 1                | 12          | 6           | 2           | 1           | 1           | 3          | 1132          |
| 6449                                                                                                                         | 1                | 2           | 6           | 2           | 1           | 2           | 57         | 1136          |
| 6450                                                                                                                         | 1                | 2           | 6           | 2           | 1           | 8           | 3          | 1137          |
| 6451                                                                                                                         | 4                | 2           | 6           | 2           | 1           | 1           | 3          | 1140          |
| 6452                                                                                                                         | 1                | 2           | 6           | 2           | 1           | 2           | 57         | 1136          |
| 6453                                                                                                                         | 1                | 12          | 6           | 2           | 20          | 1           | 3          | 1146          |
| 6454                                                                                                                         | 4                | 2           | 6           | 2           | 1           | 1           | 3          | 1140          |

---

|      |   |    |    |   |    |    |    |      |
|------|---|----|----|---|----|----|----|------|
| 6455 | 1 | 12 | 6  | 2 | 1  | 2  | 3  | 501  |
| 6456 | 1 | 12 | 6  | 2 | 1  | 1  | 3  | 1132 |
| 6457 | 8 | 2  | 6  | 4 | 1  | 2  | 3  | 1139 |
| 6458 | 1 | 2  | 6  | 2 | 1  | 2  | 57 | 1136 |
| 6459 | 4 | 2  | 6  | 2 | 1  | 1  | 3  | 1140 |
| 6460 | 1 | 2  | 6  | 2 | 1  | 8  | 3  | 1137 |
| 6461 | 1 | 2  | 6  | 2 | 1  | 2  | 57 | 1136 |
| 6462 | 1 | 2  | 6  | 2 | 1  | 8  | 3  | 1137 |
| 6463 | 1 | 4  | 3  | 2 | 1  | 2  | 3  | 1143 |
| 6464 | 8 | 2  | 6  | 4 | 1  | 2  | 3  | 1139 |
| 6465 | 1 | 4  | 3  | 2 | 1  | 1  | 3  | 1692 |
| 6466 | 1 | 12 | 6  | 2 | 1  | 1  | 3  | 1132 |
| 6467 | 8 | 2  | 6  | 4 | 1  | 2  | 3  | 1139 |
| 6468 | 1 | 2  | 6  | 2 | 1  | 2  | 57 | 1136 |
| 6469 | 1 | 2  | 14 | 2 | 5  | 2  | 1  | 1434 |
| 6470 | 4 | 2  | 3  | 4 | 1  | 2  | 1  | 202  |
| 6471 | 1 | 2  | 6  | 2 | 1  | 8  | 3  | 1137 |
| 6472 | 1 | 4  | 3  | 2 | 1  | 1  | 1  | 1364 |
| 6473 | 1 | 2  | 6  | 2 | 1  | 2  | 57 | 1136 |
| 6474 | 1 | 12 | 6  | 2 | 1  | 1  | 3  | 1132 |
| 6475 | 1 | 2  | 6  | 2 | 1  | 8  | 3  | 1137 |
| 6476 | 8 | 2  | 6  | 4 | 1  | 2  | 3  | 1139 |
| 6477 | 1 | 2  | 14 | 2 | 5  | 2  | 1  | 1434 |
| 6479 | 1 | 2  | 6  | 2 | 1  | 8  | 3  | 1137 |
| 6480 | 1 | 12 | 6  | 2 | 1  | 1  | 3  | 1132 |
| 6481 | 1 | 12 | 6  | 2 | 1  | 1  | 3  | 1132 |
| 6482 | 1 | 2  | 6  | 2 | 1  | 8  | 3  | 1137 |
| 6483 | 1 | 2  | 6  | 2 | 1  | 8  | 3  | 1137 |
| 6485 | 4 | 2  | 6  | 2 | 1  | 1  | 3  | 1140 |
| 6486 | 1 | 12 | 6  | 2 | 1  | 1  | 3  | 1132 |
| 6487 | 1 | 2  | 6  | 2 | 1  | 8  | 3  | 1137 |
| 6488 | 1 | 12 | 6  | 2 | 20 | 1  | 3  | 1146 |
| 6489 | 1 | 2  | 6  | 2 | 1  | 8  | 3  | 1137 |
| 6490 | 1 | 2  | 6  | 2 | 1  | 8  | 3  | 1137 |
| 6491 | 1 | 12 | 6  | 2 | 1  | 8  | 3  | 1147 |
| 6492 | 1 | 2  | 6  | 2 | 1  | 8  | 3  | 1137 |
| 6493 | 1 | 12 | 6  | 2 | 1  | 1  | 3  | 1132 |
| 6494 | 1 | 4  | 3  | 2 | 1  | 1  | 87 | 1933 |
| 6495 | 1 | 2  | 6  | 2 | 1  | 2  | 57 | 1136 |
| 6496 | 4 | 4  | 10 | 2 | 1  | 42 | 11 | 1934 |
| 6497 | 1 | 2  | 6  | 2 | 1  | 8  | 3  | 1137 |
| 6498 | 1 | 2  | 6  | 2 | 1  | 8  | 3  | 1137 |
| 6499 | 1 | 2  | 6  | 2 | 1  | 8  | 3  | 1137 |
| 6500 | 1 | 2  | 6  | 2 | 1  | 2  | 57 | 1136 |

---
