# Supplementary material for: Biogeography and genetic diversity of clinical isolates of Burkholderia pseudomallei in Sri Lanka
Source: PubMed Central journal article supplement (PMC8824316; doi:10.1371/journal.pntd.0009917), 2021-12-01
Supplement: pntd.0009917.s005.pdf [file pntd.0009917.s005.pdf]

**S5 Table.** Genetic diversity, geographic distribution and clinical outcomes of melioidosis patients with *Burkholderia pseudomallei* that shared the founder genotype ST1132.

|    | Isolate |  | YLF/<br>BTFC<br>clade | <i>fhab3</i> | <i>bimA<sub>BM</sub></i> /<br><i>bimA<sub>BP</sub></i> | LPSA | Geographical<br>region | Clinical presentations                                            |
|----|---------|--|-----------------------|--------------|--------------------------------------------------------|------|------------------------|-------------------------------------------------------------------|
| 1  | BPs2a/b |  | YLF                   | +            | <i>bimA<sub>BP</sub></i>                               | +    | CP                     | multiple skin and soft tissue abscesses, septic arthritis, sepsis |
| 2  | BPs11   |  | YLF                   | +            | <i>bimA<sub>BP</sub></i>                               | +    | WP                     | psoas abscess                                                     |
| 3  | BPs43   |  | YLF                   | +            | <i>bimA<sub>BP</sub></i>                               | +    | UVA                    | multiple skin and soft tissue abscesses, septic arthritis, sepsis |
| 4  | BPs45   |  | YLF                   | +            | <i>bimA<sub>BP</sub></i>                               | +    | NWP                    | abscess over the chest, P/H of abscess over right thigh           |
| 5  | BPs60   |  | YLF                   | +            | <i>bimA<sub>BP</sub></i>                               | +    | NWP                    | sepsis/ headache / abdominal pain                                 |
| 6  | BPs61   |  | YLF                   | +            | <i>bimA<sub>BP</sub></i>                               | +    | NWP                    | splenic abscess, sepsis                                           |
| 7  | BPs64   |  | YLF                   | +            | <i>bimA<sub>BP</sub></i>                               | +    | NWP                    | R/S knee joint septic arthritis                                   |
| 8  | BPs91   |  | YLF                   | +            | <i>bimA<sub>BP</sub></i>                               | +    | NWP                    | endocarditis of aortic valve                                      |
| 9  | BPs 144 |  | YLF                   | +            | <i>bimA<sub>BP</sub></i>                               | +    | NWP                    | sepsis                                                            |
| 10 | BPs 155 |  | YLF                   | +            | <i>bimA<sub>BP</sub></i>                               | +    | WP                     | sepsis                                                            |
| 11 | BPs 171 |  | YLF                   | +            | <i>bimA<sub>BP</sub></i>                               | +    | WP                     | NA                                                                |
| 12 | BPs 180 |  | YLF                   | -            | <i>bimA<sub>BP</sub></i>                               | +    | NWP                    | cervical lymph node abscess                                       |
| 13 | BPs 186 |  | YLF                   | +            | <i>bimA<sub>BP</sub></i>                               | +    | WP                     | sepsis, prostatitis,                                              |
| 14 | BPs 191 |  | YLF                   | -            | <i>bimA<sub>BP</sub></i>                               | +    | NWP                    | parotid abscess                                                   |
| 15 | BPs 196 |  | YLF                   | -            | <i>bimA<sub>BP</sub></i>                               | +    | NWP                    | splenic abscess                                                   |
| 16 | BPs 204 |  | YLF                   | +            | <i>bimA<sub>BP</sub></i>                               | +    | NWP                    | parotid abscess                                                   |

UVA - Uva Province, NWP - North Western Province, CP - Central Province, WP - Western Province, SP - Southern Province, NCP - North Central Province, SGP - Sabaragamuwa Province, *bimA<sub>BP</sub>*/*bimA<sub>BM</sub>* – *Burkholderia* intracellular motility factor (*BimA*) gene variants, *fhaB3* - filamentous hemagglutinin 3, YLF – *Yersinia*-like fimbrial gene cluster (YLF-clade), BTFC - *Burkholderia thailandensis* flagellum and chemotaxis gene cluster (BTFC-clade), LPSA - lipopolysaccharide (LPS) O-antigen type A, + - positive, - - negative, nd - not determined.
